# Supplementary material for: Cardiac progenitors instruct second heart field fate through Wnts
Source: PubMed Central journal article supplement — Proc Natl Acad Sci U S A. 2023 Jan 17;120(4):e2217687120. doi: 10.1073/pnas.2217687120 (PMC9942880; doi:10.1073/pnas.2217687120), 2023-01-17
Supplement: pnas.2217687120.sapp.pdf [file pnas.2217687120.sapp.pdf]

## Online Methods

### *Animal work*

Mesp1-Cre<sup>1</sup>, Tbx1-Cre<sup>2</sup>, Islet1-Cre<sup>3</sup>, Hcn4-GFP<sup>4,5</sup>, Wntless loxp (stock no. 012888, Jackson Laboratory<sup>6</sup>), and Ai9 (stock no. 007909, Jackson Laboratory<sup>7</sup>) mouse strains were utilized in *in vivo* experiments. Embryos were harvested from embryonic day 8.0-9.5 for further analysis. For evaluating the phenotype of each Cre driver we performed dissections in at least 3 litters to determine penetrance. No embryos were excluded from analysis, however yolk sacs without embryos were discarded. Each embryo was genotyped using tissue from individual yolk sacs for Wls loxp and relevant Cre driver. Embryos intended for cryo-sectioning and immunofluorescence were cleaned, fixed in 4% PFA for two hours, and stored in 30% sucrose overnight. Embryos were then embedded in OCT and flash frozen before sectioning. Tbx5 (Atlas Antibodies; HPA008786; 1:250), cTnt (Thermo Fisher; MS-295-P1; 1:500), CD31 (BD Biosciences; 553371; 1:200), Islet1 (DSHB; 39.3F7; 1:200), Nkx2-5 (SCBT; sc-8697; 1:250), PHH3 (Millipore Sigma; 06-570; 1:1000, Thermo Fisher; MA5-15220; 1:300), RFP (ChromoTek; 5F8; 1:200). We have verified these antibodies in previous studies<sup>8,9</sup>. Stained sections were imaged on a Keyence BZ-X710 and ACCM Leica SP8 Confocal microscope. For proliferation analysis, proliferating cells on stained sections were quantified using ImageJ where we quantified Mesp1<sup>+/+</sup> Tbx5<sup>-</sup>/Phh3<sup>+</sup> cells in the SHF domain. Two sample t-test was used to establish significance.

Embryos intended for transcriptomic analysis were dissected, staged, and stored on ice in cold PBS *-/-*. Yolk sacs were saved for genotyping. Embryos were dissociated using TrypLe and barcoded using MULTI-seq anchor and primers<sup>10</sup>, before cell sorting was completed for Mesp1<sup>+</sup>/tdTomato<sup>+</sup> cells using Sony SH800. Cells were then captured for 10x library prep and single cell RNA sequencing. All protocols involving animals followed U.S NIH guidelines and were approved by the ACUC of JHMI.

### *Hybridization Chain Reaction whole mount in situ*

E8.5 NIH/Swiss embryos were collected and fixed overnight in 4% paraformaldehyde then dehydrated in methanol. HCR was performed as previously described<sup>11,12</sup>. V3.0 HCR probes were purchased from Molecular Instruments, Inc. HCR labeled embryos were cleared in Ce3D++<sup>11,13</sup> and imaged on a Nikon A1R confocal microscope using a 10x objective NA = 0.4.

### *Single cell RNA-sequencing*

We multiplexed samples using the MULTI-seq protocol<sup>10</sup>. Anchor and co-anchor LMOs were kindly provided to us by the Gartner lab. Samples were prepared and sequenced using the 10x Chromium 3' v3 workflow, and sequenced on either a Next-seq5000 (runs 1 and 2) or NovaSeq6000 (run 3). Demultiplexing and barcode identification was performed using the deMULTIplex package (1.0.2)<sup>10</sup>. We performed integration of the runs using the SCTransform workflow implemented in Seurat (3.1.4)<sup>14-16</sup>. To identify clusters, we overclustered by using a resolution of 2.0, and subsequently merged clusters based on expression of marker genes. Differential gene expression testing was performed using the Wilcoxon Rank Sum test as implemented in Seurat, with differentially expressed genes identified with Bonferonni-correction-adjusted p-values < 0.05. Gene Ontology analysis was done using the Gene Ontology Resource online tool<sup>17,18</sup>, and visualization was performed with REViGO<sup>19</sup>. Trajectory reconstruction was performed in Monocle 2<sup>20</sup> (2.12.0). We generated trajectories using the list of genes differentially expressed between control and knockout cells at e9.5, though we obtained similar results using dpFeature. Differential expression analysis across the trajectories was performed with tradeSeq<sup>21</sup> (1.3.15). We focused on genes with Benjamini-Hochberg-corrected p-values < 0.05 and log<sub>2</sub>(Fold Change) >= 0.8. We clustered gene trends using complete-linkage hierarchical clustering as implemented in the pheatmap package (1.0.12). All of the code used for analysis in this manuscript can be found on Github at: <https://github.com/skannan4/wls>.

### *scRNA-seq Library Preparation and Sequencing*

We multiplexed samples for sequencing using the MULTI-seq protocol<sup>10</sup>. We adapted the protocol described below from the instructions provided to us by the Gartner lab. The following primers/adapters were used:

- Anchor LMO: 5'-TGGAATTCTCGGGTGCCAAGGgtaacgatccagctgtcact-{Lipid}-3'
- Co-Anchor LMO: 5'-{Lipid}-AGTGACAGCTGGATCGTTAC-3'
- Barcode Oligo: 5'-CCTTGGCACCCGAGAATTCCANNNNNNNNA<sub>30</sub>-3'
- MULTI-seq Primer: 5'-CTTGGCACCCGAGAATTCC-3'
- TruSeq RPIX: 5'-  
CAAGCAGAAGACGGCATAACGAGATNNNNNNGTGACTGGAGT
- TCCTTGGCACCCGAGAATTCCA-3'

- Universal I5: 5'-  
AATGATACGGCGACCACCGAGATCTACACTCTTTCCCTACAC  
GACGCTCTTCCGATCT-3'

The anchor and co-anchor LMOs were kindly provided to us by the Gartner lab; the barcode oligos, MULTI-seq primer, and TruSeq RPIX were ordered from Integrated DNA Technologies using barcodes provided by the Gartner lab; and the Universal i5 was part of the 10x Chromium 3' v3 Reagent kit.

Briefly, after sorting, cells were incubated with a 10x anchor:barcode solution for 5 minutes on ice, followed by incubation with 10x co-anchor solution for 5 minutes. We subsequently added 1% BSA in PBS and washed 2-3 times. We used the 10x Chromium 3' v3 workflow to encapsulate and capture cells, reverse transcribe mRNA, and purify cDNA. To capture the barcode sequences, we performed the 10x cDNA amplification reaction, but with addition of the MULTI-seq primer. Cleanup with 0.6x SPRI beads enabled separation of endogenous transcript cDNA and barcodes – endogenous transcripts remained bound to the beads while barcodes were eluted in the supernatant. We then separately processed the endogenous cDNA and barcodes using the 10x workflow. For the experiments sequenced on 10/21/19, sequencing of the endogenous transcripts was done on a NextSeq500 high output lane using a 28/8/91 bp design for R1/i7/R2. Sequencing of the barcodes was done a NextSeq500 mid output lane using a 28/8/8 design for R1/i7/R2. For the experiments sequenced on 03/04/20, sequencing for both endogenous and barcode transcripts was done on a NovaSeq6000 S1 flow cell, using a 28/8/91 bp design; the barcode transcripts were subsequently trimmed using the BBDMap/BBTools suite<sup>22</sup>.

#### *scRNA-seq Analysis*

All of the code used for analysis in this manuscript can be found on Github at <https://github.com/skannan4/wls>.

#### *Mapping and Demultiplexing*

Endogenous cDNA reads were mapped using Kallisto|Bustools (0.46.1)<sup>23</sup>. We removed poor quality barcodes and demultiplexed the samples using deMULTIplex (1.0.2)<sup>10</sup>, with minor modifications as described in our code. We removed all cells classified as “Negative” or “Doublet”. Our final analysis yielded the following samples:

- Run 1 (10/21/19): 1 e8.5 KO, 2 e8.5 WT, 1 e9.5 KO, 2 e9.5 WT
- Run 2 (10/21/19): 1 e7.5 WT, 2 e9.5 KO, 2 e9.5 WT
- Run 3 (03/04/20): 3 e8.0 KO, 3 e8.0 WT, 3 e9.5 KO, 2 e9.5 WT

We performed further quality control by removing low quality cells and putative doublets using the following selection criteria –  $2500 < \text{genes} < 9000$ ; mitochondrial percentage  $< 22\%$ ; total UMIs  $< 62500$ .

#### *Dataset Integration, Dimensionality Reduction, and Clustering*

Integration of the three runs was performed using the SCTransform workflow in the Seurat package (3.1.4)<sup>16</sup> as described by the vignette provided by the authors. In particular, we selected 3000 features for integration. Following integration, we found little evidence of batch-specific clustering, suggesting successful integration of the three runs. Dimensionality reduction via UMAP and clustering (using the Louvain algorithm) were performed in Seurat. We selected 15 principal components for clustering, as an elbow plot indicated that these were sufficient for capturing the majority of variation in the dataset; moreover, we found that increasing the number of principal components led to abiological clustering. As discussed below, we overclustered by using a resolution of 2.0 and subsequently merging similar clusters.

#### *Clustering and Annotation Strategy*

There is no established method for identifying the optimal number or size of clusters for an scRNA-seq experiment, though various metrics and strategies have been proposed<sup>24</sup>. Indeed, the appropriate clustering approach will vary from experiment to experiment based on the goals and desired resolution. Further, clustering multiple groups of transcriptomically similar progenitor cell populations also complicates this process. Our strategy here was to purposely overcluster (e.g. generate more clusters than biologically expected) and then manually merge and label clusters based on expression of marker genes of interest. Here, we discuss the markers we selected for identification of clusters: We utilized a set of known canonical markers to identify each cluster of cells. Clusters that were labeled as the same cell identity were merged. Our initial clustering (after filtering of obvious RBCs) resulted in 34 clusters of cells. First, we determined somitic mesoderm (sclerotome and dermomyotome), through high expression of the gene *Meox1*<sup>25</sup>. We were able to differentiate between sclerotome and dermomyotome through expression of *Pax1*<sup>26–29</sup> (Sclerotome; clusters 9, 12, 21) and *Pax3*<sup>27,30,31</sup> (Dermomyotome; clusters 8,23). Next, we utilized a recent very thorough single cell analysis of heart development<sup>32</sup>, as well as other studies, to

identify cardio-pharyngeal clusters through published marker genes. We determined our pharyngeal mesoderm (PhM; clusters 1, 4, 19, 20, 26) through co-expression of *Fst*, *Ebf1* and *Tbx1*<sup>32</sup>. We determined anterior SHF identity through co-expression of *Fgf8/10*, *Isl1*, *Tbx1*, and *Sema3c* (aSHF; clusters 0, 29)<sup>32</sup>. The posterior SHF (pSHF) cluster comprised the pSHF and its close derivatives. It was identified through upregulation of *Osr1*, *Hoxb1*, and *Foxf1*, with mild *Islet1* expression (pSHF; clusters 5, 7, 27, 33)<sup>32</sup>. The FHF cluster comprised the FHF and its close derivatives. This cluster was mostly present at e8.0, and expressed FHF markers *Hcn4*, *Sfrp5*, *Tbx5*, and mild expression of the cardiomyocyte markers *Tnnt2* and *Nkx2-5* (FHF; cluster 24)<sup>32</sup>. Cardiomyocytes were identified by cardiomyocyte markers including *Tnnt2*, *Nkx2-5*, *Myh6* (CM; cluster 17)<sup>32</sup>. OT CMs were identified specifically by co-expression of CM markers and *Fgf8* and *Isl1* (OT CM; cluster 15). The proepicardium was identified through *Wt1* and *Tbx18* co-expression<sup>33,34</sup> (proepicardium; clusters 6, 13). Mesenchymal cells were identified through co-expression of *Postn*<sup>35</sup>, *Vim*<sup>36</sup>, *Pitx1*, *Twist*, and *Tek* (Mesenchyme; cluster 22). Forelimb identity was established through co-expression of *Fgf10*, *Tbx5*<sup>37,38</sup>, *Tshz2* and *Lmx1b*<sup>39</sup> (Forelimb; clusters 2, 11, 14, 18, 29, 32). We differentiated between forelimb and hindlimb through *Tbx4* and *Tbx5* expression (forelimb expressing *Tbx5* and hindlimb expressing *Tbx4*)<sup>40</sup>, in addition to expression of *Pitx1*<sup>41</sup>, *Hoxb8*<sup>42</sup>, and *Hoxc6*<sup>43</sup> (Hindlimb; clusters 10, 25, 32). We identified the endocardium/endothelial identity through co-expression of *Kdr* and *Tek* (EC; cluster 3)<sup>44</sup>. Remaining cells which clustered separately from other cell types and showed no discernable gene expression patterns were identified as extraembryonic in origin (Extraembryonic, clusters 16, 34).

#### *Differential Gene Expression Testing and Analysis*

Differential expression testing (as in Fig. 3F) was performed by comparing control to knockout cells in each population at each timepoint using the Wilcoxon rank sum test as implemented as Seurat. For a comparison to be performed, we required at least 10 cells to be present in both the control and knockout. A minimum expression of 25% of cells was used as a cutoff for testing genes, and a minimum log fold change of .25 was used for reporting results. We subsequently selected genes with Bonferroni correction-adjusted p-value < 0.05. We performed Gene Ontology Overrepresentation Analysis by inputting differentially expressed genes into the online Gene Ontology Resource<sup>17,18</sup>. Summary and visualization of GO terms was done by selecting the top 150 GO terms by fold enrichment and inputting to REVIGO<sup>19</sup>. For Fig. 3G, we selected genes that were differentially expressed in only one tissue at e9.5, while for Fig. S6F, we selected genes that were differentially expressed in at least 7 tissues.

### *Ligand-receptor Interaction Analysis*

We used the CellTalkDB mouse ligand-receptor database as our source of ligand-receptor interactions. We narrowed down our analysis using the following criteria: 1) the receptor should be differentially expressed in aSHF cells, based on our tradeSeq analysis using diffEndTest; and 2) the corresponding ligand should be expressed (at any level) in at least 25% of FHF cells. Receptors were then visualized as branched heatmaps.

### *Trajectory Reconstruction and Analysis*

Trajectory reconstruction was performed using Monocle 2<sup>20</sup>(2.12.0); while we initially tested Monocle 3 and Slingshot, we found that Monocle 2 offered the most flexibility and yielded trajectories that most matched the expected biology. We used a semi-supervised approach to generating trajectories. We first selected the 8000 most variable genes; these genes were provided as input to differential gene expression testing between the control and knockout cells at e9.5. We subsequently selected the 3000 most differentially expressed genes to construct the trajectory. This approach potentially biases to differences between control and knockout at the expense of other biological variation. We favored this approach because our specific goal was to understand the deviation in the states of the control and knockout cells. However, we found that an unbiased approach (dpFeature, as implemented in Monocle 2) yielded similar trajectories, suggesting that the control vs knockout differences are the most notable biological variation in our tested cells. We performed differential gene expression testing across the branches by using tradeSeq (1.3.15)<sup>21</sup>. As the pseudotimes from Monocle 2 may be somewhat arbitrary across branches, we stretch branches such that they had the same overall length and end pseudotime. We additionally pruned small side branches that were likely artefactual. We fit generalized additive models to genes expressed in at least 20% of cells across the branches, and identified genes differentially expressed across the end states using the diffEndTest function in tradeSeq. The p-values reported by tradeSeq are to be interpreted with some caution; however, simply to specify a threshold for further analysis, we focused on genes with Benjamini-Hochberg-corrected p-values  $< 0.05$  and  $\log_2(\text{Fold Change}) \geq 0.8$ . We clustered gene trends using complete-linkage hierarchical clustering as implemented in the pheatmap package (1.0.12).

### *Precardiac organoid experiments*

Organoid experiments were performed as previously described<sup>8,45</sup>. Briefly, we treated differentiation day 4 precardiac organoids with IWP-2 (to block Wnt secretion) +/- recombinant Wnt2 protein. We analyzed GFP/RFP percentage on differentiation day 7 using Sony SH800

(Sony Biotechnologies). Analysis was performed using FlowJo Software. Samples with less than 30,000 events were discarded from analysis.

*Data Availability:*

Full data set and code are available on Synapse and GitHub:

Data: <https://www.synapse.org/#!Synapse:syn24200678/files/>

Code: <https://github.com/skannan4/wls>

## References

1. Saga Y, Miyagawa-Tomita S, Takagi A, Kitajima S, Miyazaki JI, Inoue T. MesP1 is expressed in the heart precursor cells and required for the formation of a single heart tube. *Development* 1999;126:3437–3447.
2. Huynh T, Chen L, Terrell P, Baldini A. A fate map of Tbx1 expressing cells reveals heterogeneity in the second cardiac field. *Genesis* 2007;45:470–475. doi:10.1002/dvg.20317.
3. Yang L, Cai CL, Lin L, Qyang Y, Chung C, Monteiro RM, et al. Isl1 Cre reveals a common Bmp pathway in heart and limb development. *Development* 2006;133:1575–1585. doi:10.1242/dev.02322.
4. Nam YJ, Lubczyk C, Bhakta M, Zang T, Fernandez-Perez A, McAnally J, et al. Induction of diverse cardiac cell types by reprogramming fibroblasts with cardiac transcription factors. *Dev* 2014;141:4267–4278. doi:10.1242/dev.114025.
5. Gong S, Zheng C, Doughty ML, Losos K, Didkovsky N, Schambra UB, et al. A gene expression atlas of the central nervous system based on bacterial artificial chromosomes. *Nature* 2003;425:917–925. doi:10.1038/nature02033.
6. Carpenter AC, Rao S, Wells JM, Campbell K, Lang RA. Generation of mice with a conditional null allele for Wntless. *Genesis* 2010;48:554–558. doi:10.1002/dvg.20651.
7. Madisen L, Zwingman TA, Sunkin SM, Oh SW, Zariwala HA, Gu H, et al. A robust and high-throughput Cre reporting and characterization system for the whole mouse brain. *Nat Neurosci* 2010;13:133–140. doi:10.1038/nn.2467.
8. Andersen P, Tampakakis E, Jimenez D V., Kannan S, Miyamoto M, Shin HK, et al. Precardiac organoids form two heart fields via Bmp/Wnt signaling. *Nat Commun* 2018;9:1–13. doi:10.1038/s41467-018-05604-8.
9. Shenje LT, Andersen P, Uosaki H, Fernandez L, Rainer PP, Cho GS, et al. Precardiac deletion of numb and numbl like reveals renewal of cardiac progenitors. *Elife* 2014;2014:e02164. doi:10.7554/eLife.02164.
10. McGinnis CS, Patterson DM, Winkler J, Conrad DN, Hein MY, Srivastava V, et al. MULTI-seq: sample multiplexing for single-cell RNA sequencing using lipid-tagged indices. *Nat Methods* 2019;16:619–626. doi:10.1038/s41592-019-0433-8.
11. Anderson MJ, Magidson V, Kageyama R, Lewandoski M. Fgf4 maintains Hes7 levels critical for normal somite segmentation clock function. *Elife* 2020;9:1–22. doi:10.7554/ELIFE.55608.
12. Anderson M, Lewandoski M. HCR on Whole Mouse Embryos. *Bio-Protocol Prepr* 2021.



13. Anderson M, Magidson V, Lewandoski M. Ce3D+ and Ce3D++ Tissue Clearing. *Bio-Protocol Prepr* 2021.
14. Stuart T, Butler A, Hoffman P, Hafemeister C, Papalexi E, Mauck WM, et al. Comprehensive Integration of Single-Cell Data. *Cell* 2019;177:1888-1902.e21. doi:10.1016/j.cell.2019.05.031.
15. Butler A, Hoffman P, Smibert P, Papalexi E, Satija R. Integrating single-cell transcriptomic data across different conditions, technologies, and species. *Nat Biotechnol* 2018;36:411–420. doi:10.1038/nbt.4096.
16. Hafemeister C, Satija R. Normalization and variance stabilization of single-cell RNA-seq data using regularized negative binomial regression. *Genome Biol* 2019;20:296. doi:10.1186/s13059-019-1874-1.
17. TheGeneOntologyConsortium. The Gene Ontology Resource: 20 years and still GOing strong. *Nucleic Acids Res* 2019;47. doi:10.1093/nar/gky1055.
18. Ashburner M, Ball CA, Blake JA, Botstein D, Butler H, Cherry JM, et al. Gene ontology: Tool for the unification of biology. *Nat Genet* 2000;25:25–29. doi:10.1038/75556.
19. Supek F, Bošnjak M, Škunca N, Šmuc T. REVIGO Summarizes and Visualizes Long Lists of Gene Ontology Terms. *PLoS One* 2011;6:e21800. doi:10.1371/journal.pone.0021800.
20. Qiu X, Mao Q, Tang Y, Wang L, Chawla R, Pliner HA, et al. Reversed graph embedding resolves complex single-cell trajectories. *Nat Methods* 2017;14:979–982. doi:10.1038/nmeth.4402.
21. Van den Berge K, Roux de Bézieux H, Street K, Saelens W, Cannoodt R, Saeys Y, et al. Trajectory-based differential expression analysis for single-cell sequencing data. *Nat Commun* 2020. doi:10.1038/s41467-020-14766-3.
22. Bushnell B, Rood J, Singer E. BBMerge – Accurate paired shotgun read merging via overlap. *PLoS One* 2017;12:e0185056. doi:10.1371/JOURNAL.PONE.0185056.
23. Melsted P, Boeshaghi AS, Liu L, Gao F, Lu L, Min KH (Joseph), et al. Modular, efficient and constant-memory single-cell RNA-seq preprocessing. *Nat Biotechnol* 2021 397 2021;39:813–818. doi:10.1038/s41587-021-00870-2.
24. Tang M, Kaymaz Y, Logeman B, Eichhorn S, Liang ZS, Dulac C, et al. Evaluating single-cell cluster stability using the Jaccard similarity index. *BioRxiv* 2020:2020.05.26.116640. doi:10.1101/2020.05.26.116640.
25. Mankoo BS, Skuntz S, Harrigan I, Grigorieva E, Candia A, Wright CVE, et al. The concerted action of Meox homeobox genes in required upstream of genetic pathways

- essential for the formation, patterning and differentiation of somites. *Development* 2003;130:4655–4664. doi:10.1242/dev.00687.
26. Christ B, Huang R, Wilting J. The development of the avian vertebral column. *Anat Embryol (Berl)* 2000;202:179–194. doi:10.1007/s004290000114.
  27. Blake JA, Ziman MR. Pax genes: Regulators of lineage specification and progenitor cell maintenance. *Dev* 2014;141:737–751. doi:10.1242/dev.091785.
  28. Ebensperger C, Wilting J, Brand-Saberi B, Mizutani Y, Christ B, Balling R, et al. Pax-1, a regulator of sclerotome development is induced by notochord and floor plate signals in avian embryos. *Anat Embryol (Berl)* 1995;191:297–310. doi:10.1007/BF00534682.
  29. Deutsch U, Dressler GR, Gruss P. Pax 1, a member of a paired box homologous murine gene family, is expressed in segmented structures during development. *Cell* 1988;53:617–625. doi:10.1016/0092-8674(88)90577-6.
  30. Galli LM, Knight SR, Barnes TL, Doak AK, Kadzik RS, Burrus LW. Identification and characterization of subpopulations of Pax3 and Pax7 expressing cells in developing chick somites and limb buds. *Dev Dyn* 2008;237:1862–1874. doi:10.1002/dvdy.21585.
  31. Goulding MD, Chalepakis G, Deutsch U, Erselius JR, Gruss P. Pax-3, a novel murine DNA binding protein expressed during early neurogenesis. *EMBO J* 1991;10:1135–1147. doi:10.1002/j.1460-2075.1991.tb08054.x.
  32. de Soysa TY, Ranade SS, Okawa S, Ravichandran S, Huang Y, Salunga HT, et al. Single-cell analysis of cardiogenesis reveals basis for organ-level developmental defects. *Nature* 2019;572:120–124. doi:10.1038/s41586-019-1414-x.
  33. von Gise A, Zhou B, Honor LB, Ma Q, Petryk A, Pu WT. WT1 regulates epicardial epithelial to mesenchymal transition through  $\beta$ -catenin and retinoic acid signaling pathways. *Dev Biol* 2011;356:421–431. doi:10.1016/j.ydbio.2011.05.668.
  34. Christoffels VM, Grieskamp T, Norden J, Mommersteeg MTM, Rudat C, Kispert A. Tbx18 and the fate of epicardial progenitors. *Nature* 2009;458:E8–E9. doi:10.1038/nature07916.
  35. Conway S, Molkenin J. Periostin as a Heterofunctional Regulator of Cardiac Development and Disease. *Curr Genomics* 2008;9:548–555. doi:10.2174/138920208786847917.
  36. Camelliti P, Borg TK, Kohl P. Structural and functional characterisation of cardiac fibroblasts. *Cardiovasc Res* 2005;65:40–51. doi:10.1016/j.cardiores.2004.08.020.
  37. Rallis C, Bruneau BG, Del Buono J, Seidman CE, Seidman JG, Nissim S, et al. Tbx5 is required for forelimb bud formation and continued outgrowth. *Development* 2003;130:2741–2751. doi:10.1242/dev.00473.

38. Agarwal P, Wylie JN, Galceran J, Arkhitko O, Li C, Deng C, et al. Tbx5 is essential for forelimb bud initiation following patterning of the limb field in the mouse embryo. *Development* 2003;130:623–633. doi:10.1242/dev.00191.
39. Taher L, Collette NM, Muruges D, Maxwell E, Ovcharenko I, Loots GG. Global Gene Expression Analysis of Murine Limb Development. *PLoS One* 2011;6:e28358. doi:10.1371/journal.pone.0028358.
40. Gilbert SF. *Formation of the Limb Bud*. *Dev. Biol.* 6th editio, Sinauer Associates; 2000.
41. Marcil A, Dumontier É, Chamberland M, Camper SA, Drouin J. Pitx1 and Pitx2 are required for development of hindlimb buds. *Development* 2003;130:45–55. doi:10.1242/dev.00192.
42. Hornstein E, Mansfield JH, Yekta S, Hu JKH, Harfe BD, McManus MT, et al. The microRNA miR-196 acts upstream of Hoxb8 and Shh in limb development. *Nature* 2005;438:671–674. doi:10.1038/nature04138.
43. Nelson CE, Morgan BA, Burke AC, Laufer E, Dimambro E, Murtaugh LC, et al. Analysis of Hox gene expression in the chick limb bud. vol. 122. 1996.
44. Lothar A, Bergemann S, Deng L, Moser M, Bode C, Hein L. Cardiac endothelial cell transcriptome. *Arterioscler Thromb Vasc Biol* 2018;38:566–574. doi:10.1161/ATVBAHA.117.310549.
45. Tampakakis E, Miyamoto M, Kwon C. In vitro generation of heart field-specific cardiac progenitor cells. *J Vis Exp* 2019;2019:e59826. doi:10.3791/59826.
